# Supplementary material for: Public stated preferences and predicted uptake for genome-based colorectal cancer screening
Source: PubMed Central journal article supplement (PMC4000055; doi:10.1186/1472-6947-14-18), 2014-03-19
Supplement: 1472-6947-14-18-S2.pdf [file 1472-6947-14-18-S2.pdf]

Start

Username:

Password:

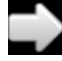

## Introduction

# UNIVERSITY OF TWENTE.

The following questionnaire is part of a research project that focuses on test preferences concerning colorectal (bowel) cancer screening. It will take about 20 minutes to complete the questionnaire. You will contribute to scientific knowledge, therefore your participation is valuable.

There will be 16 questions with different testscenarios. Each question shows three testscenarios from which you need to choose the test you prefer most. After you made a decision you can also choose not to be screened. Some graphical aids are used for clarification. Finally you will be asked a few personal questions.

Your participation is voluntarily. Your answers are entirely confidential and anonymous. With the presentation of the results only group results will be displayed, therefore individual data cannot be recognized.

## YesNo

The next question is important for your participation.

Do you have colorectal (bowel) cancer?

Yes

No

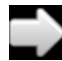

0%  100%

Example

The following is an example of a testscenario.

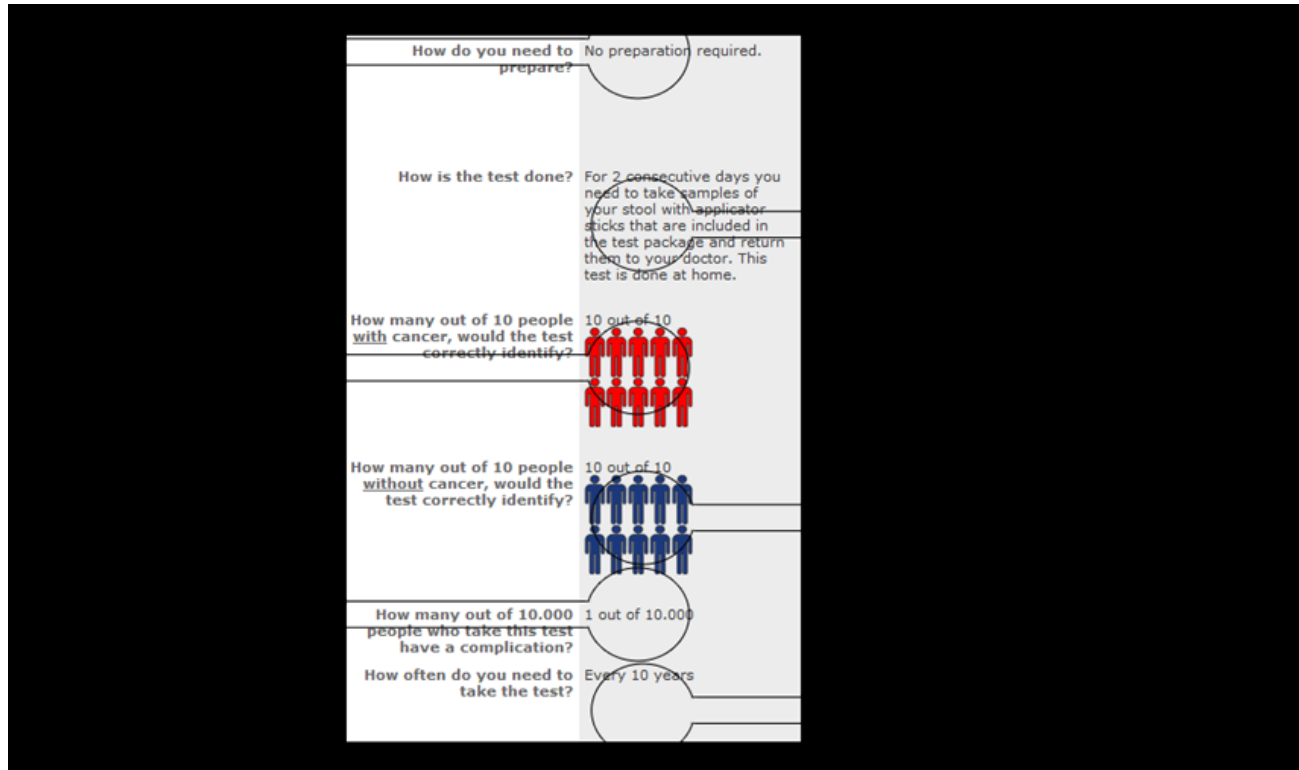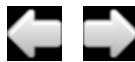

0%  100%

Example 1

The following is an example of a question. Please note that you have to make two decisions.

**Imagine that you can choose how you will be screened for colorectal cancer. Please look at the screening tests below and select the test you prefer by clicking the button below this test.**

|                                                                                     | Test 1                                                                                                                                                                                | Test 2                                                                                                                                   | Test 3                                                                                                                                                                  |
|-------------------------------------------------------------------------------------|---------------------------------------------------------------------------------------------------------------------------------------------------------------------------------------|------------------------------------------------------------------------------------------------------------------------------------------|-------------------------------------------------------------------------------------------------------------------------------------------------------------------------|
| <b>How do you need to prepare?</b>                                                  | No preparation required.                                                                                                                                                              | Before the test you need to take enemas which cause diarrhoea to empty your colon.                                                       | For 3 days you need to alter your diet and medication. Before the test you need to take laxatives which cause diarrhoea to empty your colon.                            |
| <b>How is the test done?</b>                                                        | For 2 consecutive days you need to take samples of your stool with applicator sticks that are included in the test package and return them to your doctor. This test is done at home. | A short flexible tube with a small camera is inserted through the anus into the last part of the colon. This test is done at a hospital. | A long flexible tube with a small camera is inserted through the anus into the full colon. During the examination you will be sedated. This test is done at a hospital. |
| <b>How many out of 10 people with cancer, would the test correctly identify?</b>    | 10 out of 10<br>                                                                                     | 8 out of 10<br>                                         | 7 out of 10<br>                                                                       |
| <b>How many out of 10 people without cancer, would the test correctly identify?</b> | 10 out of 10<br>                                                                                    | 9 out of 10<br>                                        | 8 out of 10<br>                                                                      |
| <b>How many out of 10,000 people who take this test have a complication?</b>        | 1 out of 10,000                                                                                                                                                                       | 10 out of 10,000                                                                                                                         | 100 out of 10,000                                                                                                                                                       |
| <b>How often do you need to take the test?</b>                                      | Every 10 years                                                                                                                                                                        | Every 5 years                                                                                                                            | Every 2 years                                                                                                                                                           |

**If you could choose between the test you chose or not to be screened for colorectal cancer, what would you prefer?**

I would still prefer the test I chose above

I would prefer not to be screened

The questionnaire starts hereafter!

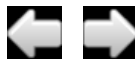

0%  100%

CBC\_Random1

Imagine that you can choose how you will be screened for colorectal cancer. Please look at the screening tests below and select the test you prefer by clicking the button below this test.

How do you need to prepare? Before the test you need to take laxatives which cause diarrhoea to empty your colon.

For 3 days you need to alter your diet and medication. Before the test you need to take laxatives which cause diarrhoea to empty your colon.

No preparation required.

How is the test done? For 2 consecutive days you need to take samples of your stool with applicator sticks that are included in the test package and return them to your doctor. This test is done at home.

A short flexible tube with a small camera is inserted through the anus into the last part of the colon. This test is done at a hospital.

A long flexible tube with a small camera is inserted through the anus into the full colon. During the examination you will be sedated. This test is done at a hospital.

How many out of 10 people with cancer, would the test correctly identify?

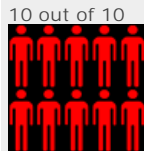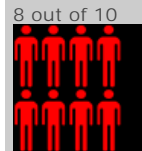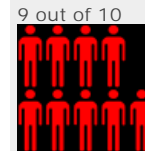

How many out of 10 people without cancer, would the test correctly identify?

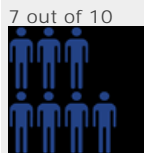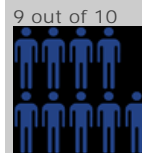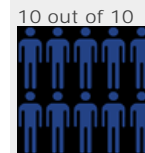

How many out of 10,000 people who take this test have a complication?

1 out of 10,000

None

100 out of 10,000

How often do you need to take the test?

Every 10 years

Every year

Every 2 years

CBC\_Random1=1

CBC\_Random1=2

CBC\_Random1=3

If you could choose between the test you chose or not to be screened for colorectal cancer, what would you prefer?

CBC\_Random1\_none=1

I would still prefer the test I chose above

CBC\_Random1\_none=2

I would prefer not to be screened

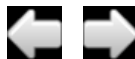

0% 100%

CBC\_Random2

Imagine that you can choose how you will be screened for colorectal cancer. Please look at the screening tests below and select the test you prefer by clicking the button below this test.

|                                                                                     |                                                                                                                                                                          |                                                                                                                                                                          |                                                                                                                                                                         |
|-------------------------------------------------------------------------------------|--------------------------------------------------------------------------------------------------------------------------------------------------------------------------|--------------------------------------------------------------------------------------------------------------------------------------------------------------------------|-------------------------------------------------------------------------------------------------------------------------------------------------------------------------|
| How do you need to prepare?                                                         | No preparation required.                                                                                                                                                 | Before the test you need to take enemas which cause diarrhoea to empty your colon.                                                                                       | Before the test you need to take laxatives which cause diarrhoea to empty your colon.                                                                                   |
| How is the test done?                                                               | You need to swallow a pill that leaves your body through faeces after several hours. Your test results are wirelessly sent to your physician. This test is done at home. | You need to swallow a pill that leaves your body through faeces after several hours. Your test results are wirelessly sent to your physician. This test is done at home. | A long flexible tube with a small camera is inserted through the anus into the full colon. During the examination you will be sedated. This test is done at a hospital. |
| How many out of 10 people <u>with</u> cancer, would the test correctly identify?    | 8 out of 10<br>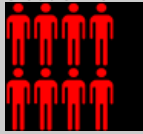                                                                         | 7 out of 10<br>                                                                         | 9 out of 10<br>                                                                      |
| How many out of 10 people <u>without</u> cancer, would the test correctly identify? | 8 out of 10<br>                                                                        | 9 out of 10<br>                                                                        | 8 out of 10<br>                                                                     |
| How many out of 10,000 people who take this test have a complication?               | 1 out of 10,000                                                                                                                                                          | 10 out of 10,000                                                                                                                                                         | None                                                                                                                                                                    |
| How often do you need to take the test?                                             | Every year                                                                                                                                                               | Every 5 years                                                                                                                                                            | Every 10 years                                                                                                                                                          |
|                                                                                     | <input type="radio"/> CBC_Random2=1                                                                                                                                      | <input type="radio"/> CBC_Random2=2                                                                                                                                      | <input type="radio"/> CBC_Random2=3                                                                                                                                     |

If you could choose between the test you chose or not to be screened for colorectal cancer, what would you prefer?

- CBC\_Random2\_none=1 I would still prefer the test I chose above
- CBC\_Random2\_none=2 I would prefer not to be screened

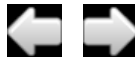

0%  100%

CBC\_Random3

Imagine that you can choose how you will be screened for colorectal cancer. Please look at the screening tests below and select the test you prefer by clicking the button below this test.

How do you need to prepare? Before the test you need to take laxatives which cause diarrhoea to empty your colon.

For 3 days you need to alter your diet and medication. Before the test you need to take laxatives which cause diarrhoea to empty your colon.

Before the test you need to take enemas which cause diarrhoea to empty your colon.

How is the test done? For 2 consecutive days you need to take samples of your stool with applicator sticks that are included in the test package and return them to your doctor. This test is done at home.

A long flexible tube with a small camera is inserted through the anus into the full colon. During the examination you will be sedated. This test is done at a hospital.

A short flexible tube with a small camera is inserted through the anus into the last part of the colon. This test is done at a hospital.

How many out of 10 people with cancer, would the test correctly identify?

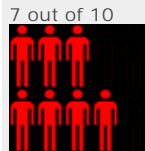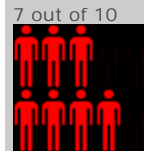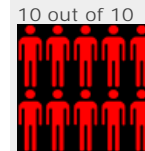

How many out of 10 people without cancer, would the test correctly identify?

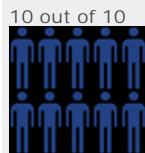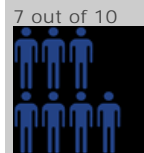

How many out of 10,000 people who take this test have a complication?

1 out of 10,000

100 out of 10,000

10 out of 10,000

How often do you need to take the test?

Every year

Every 5 years

Every 2 years

CBC\_Random3=1

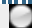

CBC\_Random3=2

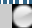

CBC\_Random3=3

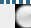

If you could choose between the test you chose or not to be screened for colorectal cancer, what would you prefer?

CBC\_Random3\_none=1

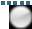

I would still prefer the test I chose above

CBC\_Random3\_none=2

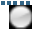

I would prefer not to be screened

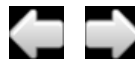

0% 100%

CBC\_Random4

Imagine that you can choose how you will be screened for colorectal cancer. Please look at the screening tests below and select the test you prefer by clicking the button below this test.

How do you need to prepare? Before the test you need to take enemas which cause diarrhoea to empty your colon.

No preparation required.

For 3 days you need to alter your diet and medication. Before the test you need to take laxatives which cause diarrhoea to empty your colon.

How is the test done? A short flexible tube with a small camera is inserted through the anus into the last part of the colon. This test is done at a hospital.

You need to swallow a pill that leaves your body through faeces after several hours. Your test results are wirelessly sent to your physician. This test is done at home.

You need to swallow a pill that leaves your body through faeces after several hours. Your test results are wirelessly sent to your physician. This test is done at home.

How many out of 10 people with cancer, would the test correctly identify?

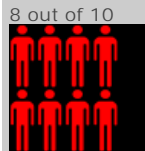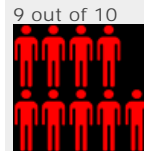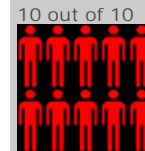

How many out of 10 people without cancer, would the test correctly identify?

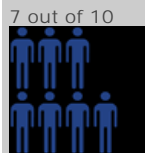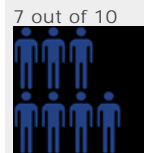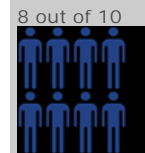

How many out of 10,000 people who take this test have a complication?

100 out of 10,000

10 out of 10,000

None

How often do you need to take the test?

Every 10 years

Every 5 years

Every 2 years

CBC\_Random4=1

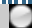

CBC\_Random4=2

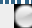

CBC\_Random4=3

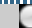

If you could choose between the test you chose or not to be screened for colorectal cancer, what would you prefer?

CBC\_Random4\_none=1

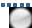

I would still prefer the test I chose above

CBC\_Random4\_none=2



I would prefer not to be screened



0%  100%



CBC\_Random5

Imagine that you can choose how you will be screened for colorectal cancer. Please look at the screening tests below and select the test you prefer by clicking the button below this test.

|                                                                                     |                                                                                                                                                                                       |                                                                                                                                                                                       |                                                                                                                                          |
|-------------------------------------------------------------------------------------|---------------------------------------------------------------------------------------------------------------------------------------------------------------------------------------|---------------------------------------------------------------------------------------------------------------------------------------------------------------------------------------|------------------------------------------------------------------------------------------------------------------------------------------|
| How do you need to prepare?                                                         | Before the test you need to take enemas which cause diarrhoea to empty your colon.                                                                                                    | Before the test you need to take laxatives which cause diarrhoea to empty your colon.                                                                                                 | No preparation required.                                                                                                                 |
| How is the test done?                                                               | For 2 consecutive days you need to take samples of your stool with applicator sticks that are included in the test package and return them to your doctor. This test is done at home. | For 2 consecutive days you need to take samples of your stool with applicator sticks that are included in the test package and return them to your doctor. This test is done at home. | A short flexible tube with a small camera is inserted through the anus into the last part of the colon. This test is done at a hospital. |
| How many out of 10 people <u>with</u> cancer, would the test correctly identify?    | 9 out of 10<br>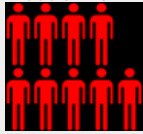                                                                                      | 10 out of 10<br>                                                                                     | 7 out of 10<br>                                       |
| How many out of 10 people <u>without</u> cancer, would the test correctly identify? | 9 out of 10<br>                                                                                     | 9 out of 10<br>                                                                                     | 10 out of 10<br>                                     |
| How many out of 10.000 people who take this test have a complication?               | 1 out of 10.000                                                                                                                                                                       | 100 out of 10.000                                                                                                                                                                     | 10 out of 10.000                                                                                                                         |
| How often do you need to take the test?                                             | Every year                                                                                                                                                                            | Every 5 years                                                                                                                                                                         | Every 10 years                                                                                                                           |
|                                                                                     | <input type="radio"/> CBC_Random5=1                                                                                                                                                   | <input type="radio"/> CBC_Random5=2                                                                                                                                                   | <input type="radio"/> CBC_Random5=3                                                                                                      |

If you could choose between the test you chose or not to be screened for colorectal cancer, what would you prefer?

- CBC\_Random5\_none=1 I would still prefer the test I chose above
- CBC\_Random5\_none=2 I would prefer not to be screened



0%  100%

CBC\_Random6

Imagine that you can choose how you will be screened for colorectal cancer. Please look at the screening tests below and select the test you prefer by clicking the button below this test.

|                                                                                     |                                                                                                                                          |                                                                                                                                                                          |                                                                                                                                                                         |
|-------------------------------------------------------------------------------------|------------------------------------------------------------------------------------------------------------------------------------------|--------------------------------------------------------------------------------------------------------------------------------------------------------------------------|-------------------------------------------------------------------------------------------------------------------------------------------------------------------------|
| How do you need to prepare?                                                         | No preparation required.                                                                                                                 | Before the test you need to take enemas which cause diarrhoea to empty your colon.                                                                                       | For 3 days you need to alter your diet and medication. Before the test you need to take laxatives which cause diarrhoea to empty your colon.                            |
| How is the test done?                                                               | A short flexible tube with a small camera is inserted through the anus into the last part of the colon. This test is done at a hospital. | You need to swallow a pill that leaves your body through faeces after several hours. Your test results are wirelessly sent to your physician. This test is done at home. | A long flexible tube with a small camera is inserted through the anus into the full colon. During the examination you will be sedated. This test is done at a hospital. |
| How many out of 10 people <u>with</u> cancer, would the test correctly identify?    | 7 out of 10<br>                                         | 8 out of 10<br>                                                                         | 10 out of 10<br>                                                                     |
| How many out of 10 people <u>without</u> cancer, would the test correctly identify? | 8 out of 10<br>                                        | 10 out of 10<br>                                                                       | 8 out of 10<br>                                                                     |
| How many out of 10,000 people who take this test have a complication?               | 10 out of 10,000                                                                                                                         | 1 out of 10,000                                                                                                                                                          | None                                                                                                                                                                    |
| How often do you need to take the test?                                             | Every year<br><input type="checkbox"/> CBC_Random6=1                                                                                     | Every 2 years<br><input type="checkbox"/> CBC_Random6=2                                                                                                                  | Every 2 years<br><input type="checkbox"/> CBC_Random6=3                                                                                                                 |

If you could choose between the test you chose or not to be screened for colorectal cancer, what would you prefer?

CBC\_Random6\_none=1 I would still prefer the test I chose above

CBC\_Random6\_none=2 I would prefer not to be screened



0%  100%

CBC\_Fixed1

Imagine that you can choose how you will be screened for colorectal cancer. Please look at the screening tests below and select the test you prefer by clicking the button below this test.

|                                                                                     |                                                                                                                                                                                       |                                                                                                                                          |                                                                                                                                                                         |
|-------------------------------------------------------------------------------------|---------------------------------------------------------------------------------------------------------------------------------------------------------------------------------------|------------------------------------------------------------------------------------------------------------------------------------------|-------------------------------------------------------------------------------------------------------------------------------------------------------------------------|
| How do you need to prepare?                                                         | No preparation required.                                                                                                                                                              | Before the test you need to take enemas which cause diarrhoea to empty your colon.                                                       | For 3 days you need to alter your diet and medication. Before the test you need to take laxatives which cause diarrhoea to empty your colon.                            |
| How is the test done?                                                               | For 2 consecutive days you need to take samples of your stool with applicator sticks that are included in the test package and return them to your doctor. This test is done at home. | A short flexible tube with a small camera is inserted through the anus into the last part of the colon. This test is done at a hospital. | A long flexible tube with a small camera is inserted through the anus into the full colon. During the examination you will be sedated. This test is done at a hospital. |
| How many out of 10 people <u>with</u> cancer, would the test correctly identify?    | 10 out of 10<br>                                                                                     | 8 out of 10<br>                                         | 7 out of 10<br>                                                                      |
| How many out of 10 people <u>without</u> cancer, would the test correctly identify? | 10 out of 10<br>                                                                                    | 9 out of 10<br>                                        | 8 out of 10<br>                                                                     |
| How many out of 10,000 people who take this test have a complication?               | 1 out of 10,000                                                                                                                                                                       | 10 out of 10,000                                                                                                                         | 100 out of 10,000                                                                                                                                                       |
| How often do you need to take the test?                                             | Every 10 years<br><input type="checkbox"/> CBC_Fixed1=1                                                                                                                               | Every 5 years<br><input type="checkbox"/> CBC_Fixed1=2                                                                                   | Every 2 years<br><input type="checkbox"/> CBC_Fixed1=3                                                                                                                  |

If you could choose between the test you chose or not to be screened for colorectal cancer, what would you prefer?

CBC\_Fixed1\_none=1 | I would still prefer the test I chose above

CBC\_Fixed1\_none=2 | I would prefer not to be screened

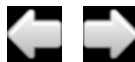

0%  100%

CBC\_Random7

Imagine that you can choose how you will be screened for colorectal cancer. Please look at the screening tests below and select the test you prefer by clicking the button below this test.

How do you need to prepare? Before the test you need to take laxatives which cause diarrhoea to empty your colon.

For 3 days you need to alter your diet and medication. Before the test you need to take laxatives which cause diarrhoea to empty your colon.

For 3 days you need to alter your diet and medication. Before the test you need to take laxatives which cause diarrhoea to empty your colon.

How is the test done? You need to swallow a pill that leaves your body through faeces after several hours. Your test results are wirelessly sent to your physician. This test is done at home.

For 2 consecutive days you need to take samples of your stool with applicator sticks that are included in the test package and return them to your doctor. This test is done at home.

A long flexible tube with a small camera is inserted through the anus into the full colon. During the examination you will be sedated. This test is done at a hospital.

How many out of 10 people with cancer, would the test correctly identify?

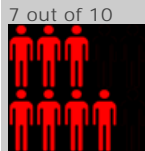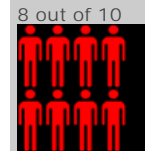

How many out of 10 people without cancer, would the test correctly identify?

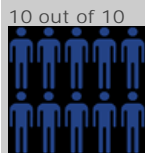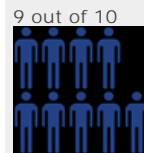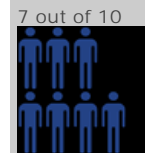

How many out of 10,000 people who take this test have a complication?

None

100 out of 10,000

1 out of 10,000

How often do you need to take the test?

Every 10 years

Every 2 years

Every 5 years

CBC\_Random7=1

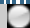

CBC\_Random7=2

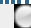

CBC\_Random7=3

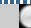

If you could choose between the test you chose or not to be screened for colorectal cancer, what would you prefer?

CBC\_Random7\_none=1

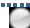

I would still prefer the test I chose above

CBC\_Random7\_none=2

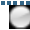

I would prefer not to be screened

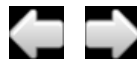

0% 100%

CBC\_Random8

Imagine that you can choose how you will be screened for colorectal cancer. Please look at the screening tests below and select the test you prefer by clicking the button below this test.

How do you need to prepare? Before the test you need to take enemas which cause diarrhoea to empty your colon.

No preparation required.

Before the test you need to take enemas which cause diarrhoea to empty your colon.

How is the test done? For 2 consecutive days you need to take samples of your stool with applicator sticks that are included in the test package and return them to your doctor. This test is done at home.

A long flexible tube with a small camera is inserted through the anus into the full colon. During the examination you will be sedated. This test is done at a hospital.

A short flexible tube with a small camera is inserted through the anus into the last part of the colon. This test is done at a hospital.

How many out of 10 people with cancer, would the test correctly identify?

8 out of 10

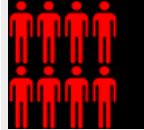

10 out of 10

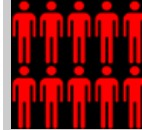

9 out of 10

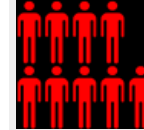

How many out of 10 people without cancer, would the test correctly identify?

7 out of 10

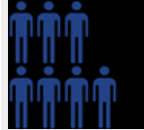

10 out of 10

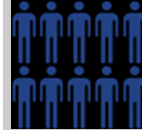

8 out of 10

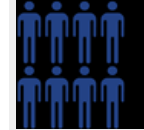

How many out of 10,000 people who take this test have a complication?

10 out of 10,000

None

100 out of 10,000

How often do you need to take the test?

Every 10 years

Every year

Every 5 years

CBC\_Random8=1

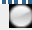

CBC\_Random8=2

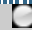

CBC\_Random8=3

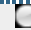

If you could choose between the test you chose or not to be screened for colorectal cancer, what would you prefer?

CBC\_Random8\_none=1

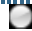

I would still prefer the test I chose above

CBC\_Random8\_none=2



I would prefer not to be screened

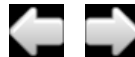

0%  100%

CBC\_Fixed2

Imagine that you can choose how you will be screened for colorectal cancer. Please look at the screening tests below and select the test you prefer by clicking the button below this test.

|                                                                                     |                                                                                                                                                                         |                                                                                                                                          |                                                                                                                                                                                       |
|-------------------------------------------------------------------------------------|-------------------------------------------------------------------------------------------------------------------------------------------------------------------------|------------------------------------------------------------------------------------------------------------------------------------------|---------------------------------------------------------------------------------------------------------------------------------------------------------------------------------------|
| How do you need to prepare?                                                         | For 3 days you need to alter your diet and medication. Before the test you need to take laxatives which cause diarrhoea to empty your colon.                            | Before the test you need to take enemas which cause diarrhoea to empty your colon.                                                       | No preparation required.                                                                                                                                                              |
| How is the test done?                                                               | A long flexible tube with a small camera is inserted through the anus into the full colon. During the examination you will be sedated. This test is done at a hospital. | A short flexible tube with a small camera is inserted through the anus into the last part of the colon. This test is done at a hospital. | For 2 consecutive days you need to take samples of your stool with applicator sticks that are included in the test package and return them to your doctor. This test is done at home. |
| How many out of 10 people <u>with</u> cancer, would the test correctly identify?    | 7 out of 10<br>                                                                        | 8 out of 10<br>                                         | 10 out of 10<br>                                                                                   |
| How many out of 10 people <u>without</u> cancer, would the test correctly identify? | 8 out of 10<br>                                                                       | 9 out of 10<br>                                        | 10 out of 10<br>                                                                                  |
| How many out of 10,000 people who take this test have a complication?               | 100 out of 10,000                                                                                                                                                       | 10 out of 10,000                                                                                                                         | 1 out of 10,000                                                                                                                                                                       |
| How often do you need to take the test?                                             | Every 2 years<br><input type="checkbox"/> CBC_Fixed2=1                                                                                                                  | Every 5 years<br><input type="checkbox"/> CBC_Fixed2=2                                                                                   | Every 10 years<br><input type="checkbox"/> CBC_Fixed2=3                                                                                                                               |

If you could choose between the test you chose or not to be screened for colorectal cancer, what would you prefer?

CBC\_Fixed2\_none=1 | I would still prefer the test I chose above

CBC\_Fixed2\_none=2 | I would prefer not to be screened



0%  100%

CBC\_Random9

Imagine that you can choose how you will be screened for colorectal cancer. Please look at the screening tests below and select the test you prefer by clicking the button below this test.

How do you need to prepare? Before the test you need to take laxatives which cause diarrhoea to empty your colon.

No preparation required.

For 3 days you need to alter your diet and medication. Before the test you need to take laxatives which cause diarrhoea to empty your colon.

How is the test done? A long flexible tube with a small camera is inserted through the anus into the full colon. During the examination you will be sedated. This test is done at a hospital.

A short flexible tube with a small camera is inserted through the anus into the last part of the colon. This test is done at a hospital.

For 2 consecutive days you need to take samples of your stool with applicator sticks that are included in the test package and return them to your doctor. This test is done at home.

How many out of 10 people with cancer, would the test correctly identify?

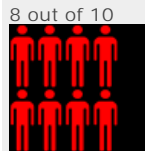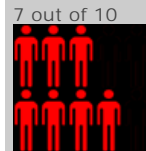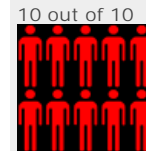

How many out of 10 people without cancer, would the test correctly identify?

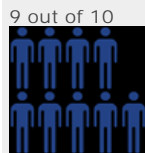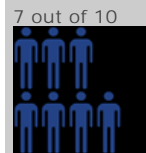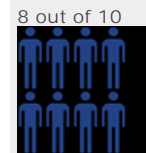

How many out of 10,000 people who take this test have a complication?

100 out of 10,000

1 out of 10,000

10 out of 10,000

How often do you need to take the test?

Every year

Every 2 years

Every 5 years

CBC\_Random9=1

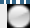

CBC\_Random9=2

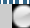

CBC\_Random9=3

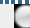

If you could choose between the test you chose or not to be screened for colorectal cancer, what would you prefer?

CBC\_Random9\_none=1

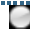

I would still prefer the test I chose above

CBC\_Random9\_none=2



I would prefer not to be screened



0% 100%

CBC\_Random10

Imagine that you can choose how you will be screened for colorectal cancer. Please look at the screening tests below and select the test you prefer by clicking the button below this test.

How do you need to prepare? No preparation required.

Before the test you need to take laxatives which cause diarrhoea to empty your colon.

Before the test you need to take laxatives which cause diarrhoea to empty your colon.

How is the test done? For 2 consecutive days you need to take samples of your stool with applicator sticks that are included in the test package and return them to your doctor. This test is done at home.

You need to swallow a pill that leaves your body through faeces after several hours. Your test results are wirelessly sent to your physician. This test is done at home.

You need to swallow a pill that leaves your body through faeces after several hours. Your test results are wirelessly sent to your physician. This test is done at home.

How many out of 10 people with cancer, would the test correctly identify?

9 out of 10

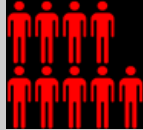

7 out of 10

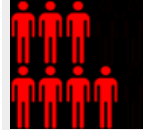

10 out of 10

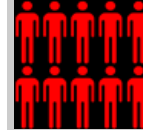

How many out of 10 people without cancer, would the test correctly identify?

9 out of 10

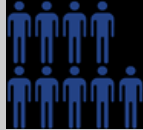

8 out of 10

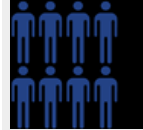

7 out of 10

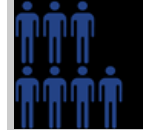

How many out of 10,000 people who take this test have a complication?

None

1 out of 10,000

100 out of 10,000

How often do you need to take the test?

Every 10 years

Every 5 years

Every 2 years

CBC\_Random10=1

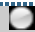

CBC\_Random10=2

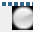

CBC\_Random10=3

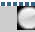

If you could choose between the test you chose or not to be screened for colorectal cancer, what would you prefer?

CBC\_Random10\_none=1

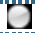

I would still prefer the test I chose above

CBC\_Random10\_none=2

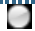

I would prefer not to be screened



0% 100%



CBC\_Random11

Imagine that you can choose how you will be screened for colorectal cancer. Please look at the screening tests below and select the test you prefer by clicking the button below this test.

|                                                                                     |                                                                                                                                          |                                                                                                                                                                         |                                                                                                                                                                          |
|-------------------------------------------------------------------------------------|------------------------------------------------------------------------------------------------------------------------------------------|-------------------------------------------------------------------------------------------------------------------------------------------------------------------------|--------------------------------------------------------------------------------------------------------------------------------------------------------------------------|
| How do you need to prepare?                                                         | Before the test you need to take laxatives which cause diarrhoea to empty your colon.                                                    | Before the test you need to take enemas which cause diarrhoea to empty your colon.                                                                                      | For 3 days you need to alter your diet and medication. Before the test you need to take laxatives which cause diarrhoea to empty your colon.                             |
| How is the test done?                                                               | A short flexible tube with a small camera is inserted through the anus into the last part of the colon. This test is done at a hospital. | A long flexible tube with a small camera is inserted through the anus into the full colon. During the examination you will be sedated. This test is done at a hospital. | You need to swallow a pill that leaves your body through faeces after several hours. Your test results are wirelessly sent to your physician. This test is done at home. |
| How many out of 10 people <u>with</u> cancer, would the test correctly identify?    | 7 out of 10<br>                                         | 8 out of 10<br>                                                                        | 9 out of 10<br>                                                                       |
| How many out of 10 people <u>without</u> cancer, would the test correctly identify? | 7 out of 10<br>                                        | 10 out of 10<br>                                                                      | 9 out of 10<br>                                                                      |
| How many out of 10,000 people who take this test have a complication?               | None                                                                                                                                     | 10 out of 10,000                                                                                                                                                        | 10 out of 10,000                                                                                                                                                         |
| How often do you need to take the test?                                             | Every 5 years<br><input type="checkbox"/> CBC_Random11=1                                                                                 | Every year<br><input type="checkbox"/> CBC_Random11=2                                                                                                                   | Every 10 years<br><input type="checkbox"/> CBC_Random11=3                                                                                                                |

If you could choose between the test you chose or not to be screened for colorectal cancer, what would you prefer?

- CBC\_Random11\_none=1 I would still prefer the test I chose above
- CBC\_Random11\_none=2 I would prefer not to be screened

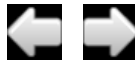

0%  100%

CBC\_Random12

Imagine that you can choose how you will be screened for colorectal cancer. Please look at the screening tests below and select the test you prefer by clicking the button below this test.

|                                                                                     |                                                                                                                                              |                                                                                                                                                                         |                                                                                                                                                                                       |
|-------------------------------------------------------------------------------------|----------------------------------------------------------------------------------------------------------------------------------------------|-------------------------------------------------------------------------------------------------------------------------------------------------------------------------|---------------------------------------------------------------------------------------------------------------------------------------------------------------------------------------|
| How do you need to prepare?                                                         | For 3 days you need to alter your diet and medication. Before the test you need to take laxatives which cause diarrhoea to empty your colon. | Before the test you need to take enemas which cause diarrhoea to empty your colon.                                                                                      | No preparation required.                                                                                                                                                              |
| How is the test done?                                                               | A short flexible tube with a small camera is inserted through the anus into the last part of the colon. This test is done at a hospital.     | A long flexible tube with a small camera is inserted through the anus into the full colon. During the examination you will be sedated. This test is done at a hospital. | For 2 consecutive days you need to take samples of your stool with applicator sticks that are included in the test package and return them to your doctor. This test is done at home. |
| How many out of 10 people <u>with</u> cancer, would the test correctly identify?    | 8 out of 10<br>                                             | 9 out of 10<br>                                                                        | 10 out of 10<br>                                                                                   |
| How many out of 10 people <u>without</u> cancer, would the test correctly identify? | 9 out of 10<br>                                            | 8 out of 10<br>                                                                       | 7 out of 10<br>                                                                                   |
| How many out of 10,000 people who take this test have a complication?               | 100 out of 10,000                                                                                                                            | 1 out of 10,000                                                                                                                                                         | None                                                                                                                                                                                  |
| How often do you need to take the test?                                             | Every 10 years<br><input type="checkbox"/> CBC_Random12=1                                                                                    | Every 2 years<br><input type="checkbox"/> CBC_Random12=2                                                                                                                | Every 10 years<br><input type="checkbox"/> CBC_Random12=3                                                                                                                             |

If you could choose between the test you chose or not to be screened for colorectal cancer, what would you prefer?

CBC\_Random12\_none=1 I would still prefer the test I chose above

CBC\_Random12\_none=2 I would prefer not to be screened



0%  100%

CBC\_Random13

Imagine that you can choose how you will be screened for colorectal cancer. Please look at the screening tests below and select the test you prefer by clicking the button below this test.

How do you need to prepare? No preparation required.

Before the test you need to take laxatives which cause diarrhoea to empty your colon.

Before the test you need to take enemas which cause diarrhoea to empty your colon.

How is the test done? A short flexible tube with a small camera is inserted through the anus into the last part of the colon. This test is done at a hospital.

You need to swallow a pill that leaves your body through faeces after several hours. Your test results are wirelessly sent to your physician. This test is done at home.

A long flexible tube with a small camera is inserted through the anus into the full colon. During the examination you will be sedated. This test is done at a hospital.

How many out of 10 people with cancer, would the test correctly identify?

10 out of 10

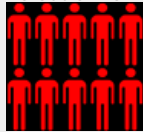

9 out of 10

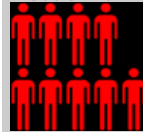

7 out of 10

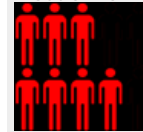

How many out of 10 people without cancer, would the test correctly identify?

9 out of 10

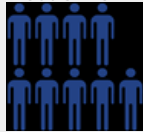

10 out of 10

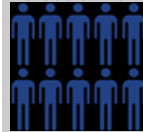

9 out of 10

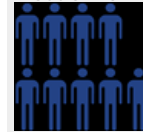

How many out of 10,000 people who take this test have a complication?

1 out of 10,000

100 out of 10,000

None

How often do you need to take the test?

Every 5 years

Every year

Every 2 years

CBC\_Random13=1

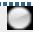

CBC\_Random13=2

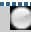

CBC\_Random13=3

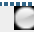

If you could choose between the test you chose or not to be screened for colorectal cancer, what would you prefer?

CBC\_Random13\_none=1

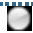

I would still prefer the test I chose above

CBC\_Random13\_none=2

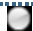

I would prefer not to be screened



0%  100%

CBC\_Random14

Imagine that you can choose how you will be screened for colorectal cancer. Please look at the screening tests below and select the test you prefer by clicking the button below this test.

|                                                                                     |                                                                                                                                                                         |                                                                                                                                                                                       |                                                                                                                                          |
|-------------------------------------------------------------------------------------|-------------------------------------------------------------------------------------------------------------------------------------------------------------------------|---------------------------------------------------------------------------------------------------------------------------------------------------------------------------------------|------------------------------------------------------------------------------------------------------------------------------------------|
| How do you need to prepare?                                                         | For 3 days you need to alter your diet and medication. Before the test you need to take laxatives which cause diarrhoea to empty your colon.                            | No preparation required.                                                                                                                                                              | Before the test you need to take enemas which cause diarrhoea to empty your colon.                                                       |
| How is the test done?                                                               | A long flexible tube with a small camera is inserted through the anus into the full colon. During the examination you will be sedated. This test is done at a hospital. | For 2 consecutive days you need to take samples of your stool with applicator sticks that are included in the test package and return them to your doctor. This test is done at home. | A short flexible tube with a small camera is inserted through the anus into the last part of the colon. This test is done at a hospital. |
| How many out of 10 people <u>with</u> cancer, would the test correctly identify?    | 9 out of 10<br>                                                                        | 8 out of 10<br>                                                                                      | 10 out of 10<br>                                      |
| How many out of 10 people <u>without</u> cancer, would the test correctly identify? | 10 out of 10<br>                                                                      | 8 out of 10<br>                                                                                     | 7 out of 10<br>                                      |
| How many out of 10,000 people who take this test have a complication?               | None                                                                                                                                                                    | 10 out of 10,000                                                                                                                                                                      | 1 out of 10,000                                                                                                                          |
| How often do you need to take the test?                                             | Every 5 years<br><input type="checkbox"/> CBC_Random14=1                                                                                                                | Every year<br><input type="checkbox"/> CBC_Random14=2                                                                                                                                 | Every year<br><input type="checkbox"/> CBC_Random14=3                                                                                    |

If you could choose between the test you chose or not to be screened for colorectal cancer, what would you prefer?

- CBC\_Random14\_none=1 I would still prefer the test I chose above
- CBC\_Random14\_none=2 I would prefer not to be screened



0%  100%

Gender

Question 17.

What is your gender?

Gender=1 Male

Gender=2 Female

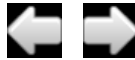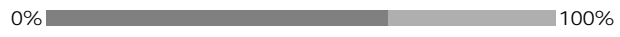

Age

Question 18.

What is your age?

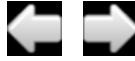

0%  100%

Status

Question 19.

What is your marital status?

Status=1  Married

Status=2  Not married

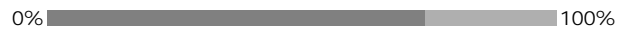

Employment

Question 20.

What is your current employment status?

Employment=1  Employed full-time

Employment=2  Employed part-time

Employment=3  Self-employed

Employment=4  Homemaker

Employment=5  Unemployed

Employment=6  Retired

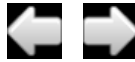

0%  100%



Education

Question 21.

What is the highest level of education you completed?

Education=1  Public or primary school

Education=2  High school

Education=3  Trade or technical qualification

Education=4  College or university

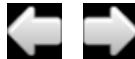

0%  100%

Family

Question 22.

Do you have a family history (parents, brothers, sisters or children) of colorectal cancer?

Family=1 Yes

Family=2 No

Family=3 Do not know

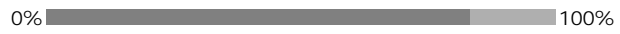

Experience

Question 23.

Do you have experience with colorectal cancer screening?

Experience=1 Yes

Experience=2 No

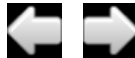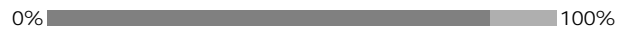

Health

Question 24.

How would you say your current health status is?

Health = 1  
 Excellent

Health = 2  
 Very good

Health = 3  
 Good

Health = 4  
 Fair

Health = 5  
 Poor

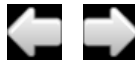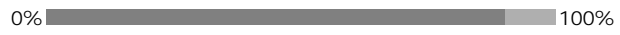

Perceivedrisk

Question 25.

Do you think you are at risk of developing colorectal cancer?

Perceivedrisk=1 Yes

Perceivedrisk=2 No

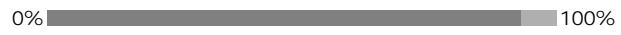

Finish

Thank you for your participation!

Your data is saved. If you have any questions about this questionnaire, please contact:

J.M. Fermont

[j.m.fermont@student.utwente.nl](mailto:j.m.fermont@student.utwente.nl)

School for Management and Governance  
Dept. Health Technology and Services Research  
<http://www.utwente.nl/education/mb>

Click on the following link to close this window and visit [Survey Sampling International](#).

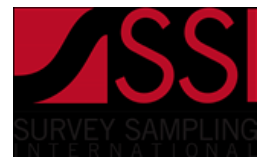

Powered by Sawtooth Software, Inc.

0%  100%

Finish2

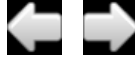

0%  100%
